# Supplementary material for: CITED4 gene silencing in colorectal cancer cells modulates adherens/tight junction gene expression and reduces cell proliferation
Source: PubMed Central journal article supplement (PMC4705123; doi:10.1007/s00432-015-2011-5), 2015-08-05
Supplement: 432_2015_2011_MOESM8_ESM.pdf [file 432_2015_2011_MOESM8_ESM.pdf]

**Supplementary Table 1** Primer pairs for qRT-PCR analysis and CITED4 cloning

| Primers for cloning of CITED4 open reading frame |                     |           |                     |                                                   |
|--------------------------------------------------|---------------------|-----------|---------------------|---------------------------------------------------|
| Gene                                             | RefSeq designations | Size (bp) | Annealing temp. (C) | Sequence                                          |
| CITED4 (ORF)                                     | nm_133467           | 556       | 72                  | atggccgaccacctgatgctc<br>tcagcgctcacggagccggc     |
| Primers for Taqman analysis                      |                     |           |                     |                                                   |
| Gene                                             | RefSeq              | Size (bp) | Annealing temp. (C) | Sequence                                          |
| CITED4                                           | nm_133467           | 83        | 68                  | atgctcgccgagggctaccgc<br>ggcagagtcgggagcgcatga    |
| SYK                                              | nm_001135052        | 139       | 57                  | gatcaggcccaaggaggtttac<br>tattttcacagccacggttttc  |
| GPR64                                            | nm_001079860        | 149       | 59                  | cctgcaatgtcaacactacca<br>atcatttctcctgcgaggttag   |
| GPR110                                           | nm_153840           | 134       | 55                  | aaacatctaggccagtcgaag<br>ctaattagcccatgtgaccata   |
| LGR6                                             | nm_021636           | 132       | 58                  | gaactggggttcataacaaca<br>caggtactggaatgccgatctt   |
| IER5                                             | nm_016545           | 102       | 61                  | aacttagagcagccgagtg<br>cgagaaactggaaccgaagatg     |
| CLDN7                                            | nm_001307           | 81        | 56                  | atgagagcaaggctgggtaccg<br>agatcccagggtcacacatactc |
| MET                                              | nm_000245           | 99        | 58                  | tttcaatggccacgggacaac<br>tgccaccagccataggaccgta   |
| $\beta$ -CATENIN                                 | nm_001904           | 148       | 59                  | gagcaggggtgccattccacgac<br>ccggtacaaccttcaactattt |
| EZRIN                                            | nm_003379           | 102       | 60                  | ggtactttggcctcactatgt<br>ggtagaacttggcccgaactt    |
| ANK3                                             | nm_001149           | 107       | 55                  | cacgggacagcatgatgattga<br>agcccagctgtaatgtctaaga  |
| AMOTL1                                           | nm_130847           | 137       | 57                  | aacagaggagaaccgggtgctt<br>ctcgcttggtagacttgac     |
| GPR56                                            | nm_201524           | 118       | 61                  | agtctgctcttctggtccaag<br>ggtctggtgtgggtttgtagtg   |
| DCTN2                                            | nm_006400           | 103       | 59                  | gtggggacaaaggacttgatt<br>cccagaccctctccaagcatct   |
| PGK1                                             | nm_000291           | 71        | 50                  | aagtgaagctcggaaagcttctat<br>agggaaaagatgcttctggg  |
