# Supplementary material for: CITED4 gene silencing in colorectal cancer cells modulates adherens/tight junction gene expression and reduces cell proliferation
Source: PubMed Central journal article supplement (PMC4705123; doi:10.1007/s00432-015-2011-5), 2015-08-05
Supplement: 432_2015_2011_MOESM9_ESM.pdf [file 432_2015_2011_MOESM9_ESM.pdf]

**Supplementary Table 2** Antibodies and labeled proteins used for immunofluorescence microscopy

| Western blotting          |                    |              |                                                    |               |
|---------------------------|--------------------|--------------|----------------------------------------------------|---------------|
| Gene                      | Antibody name      | Dilution WB  | secondary antibody (WB)                            | Dilution (WB) |
| CITED4                    | TA307013 (Origene) | 1:500        | Anti-rabbit HRP, Cell Signaling Technologies 7074S | 1:1000        |
| GPR110                    | AB75306 (Abcam)    | 1:500        |                                                    | 1:1000        |
| LGR6                      | L4169 (Sigma)      | 1:1000       |                                                    | 1:1000        |
| CLDN7                     | PAS-23689 (Thermo) | 1:500        |                                                    | 1:1000        |
| EZRIN                     | MA5-13862 (Thermo) | 1:1000       | Anti-mouse HRP, Cell Signaling Technologies 7076S  | 1:1000        |
| SYK                       | 4D10.1 (Millipore) | 1:1000       |                                                    | 1:1000        |
| GAPDH                     | CB1001 (Millipore) | 1:10000      |                                                    | 1:1000        |
| Fluorescence microscopy   |                    |              |                                                    |               |
| Gene                      | Antibody name      | Dilution IIF | Secondary antibody IIF                             | Dilution IIF  |
| VINCULIN                  | 90227 (Millipore)  | 1:200        | Anti-mouse Alexa488 Molecular Probes A21204        | 1:200         |
| F-ACTIN (TRIC-Phalloidin) | 90228 (Millipore)  | 1:200        | -                                                  | -             |
